# Supplementary material for: A novel approach to a fully inkjet printed SnO2-based gas sensor on a flexible foil
Source: Royal Society of Chemistry journal article supplement (doi:10.1039/c9tc04170b), 2019-01-01
Supplement: c9tc04170b1.pdf [file c9tc04170b1.pdf]

Supporting Information ESI<sup>†</sup>

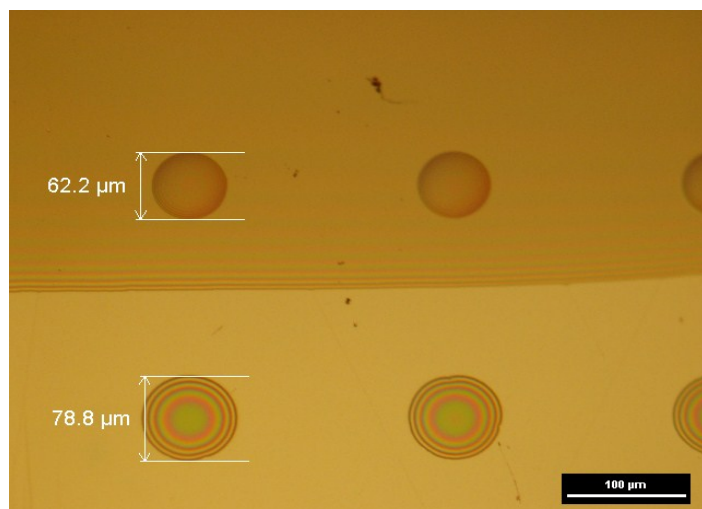

**Fig. S1** Optical microscopic view of polyimide ink single droplets deposited on polyimide film (top) and Upilex (bottom)

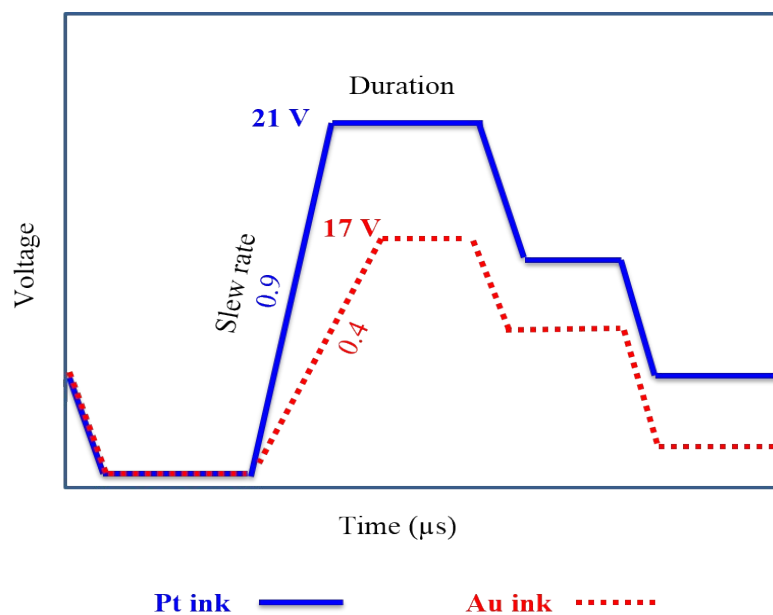

**Fig. S2** Jetting waveform of Dimatix Inkjet-printer adapted for platinum and gold inks

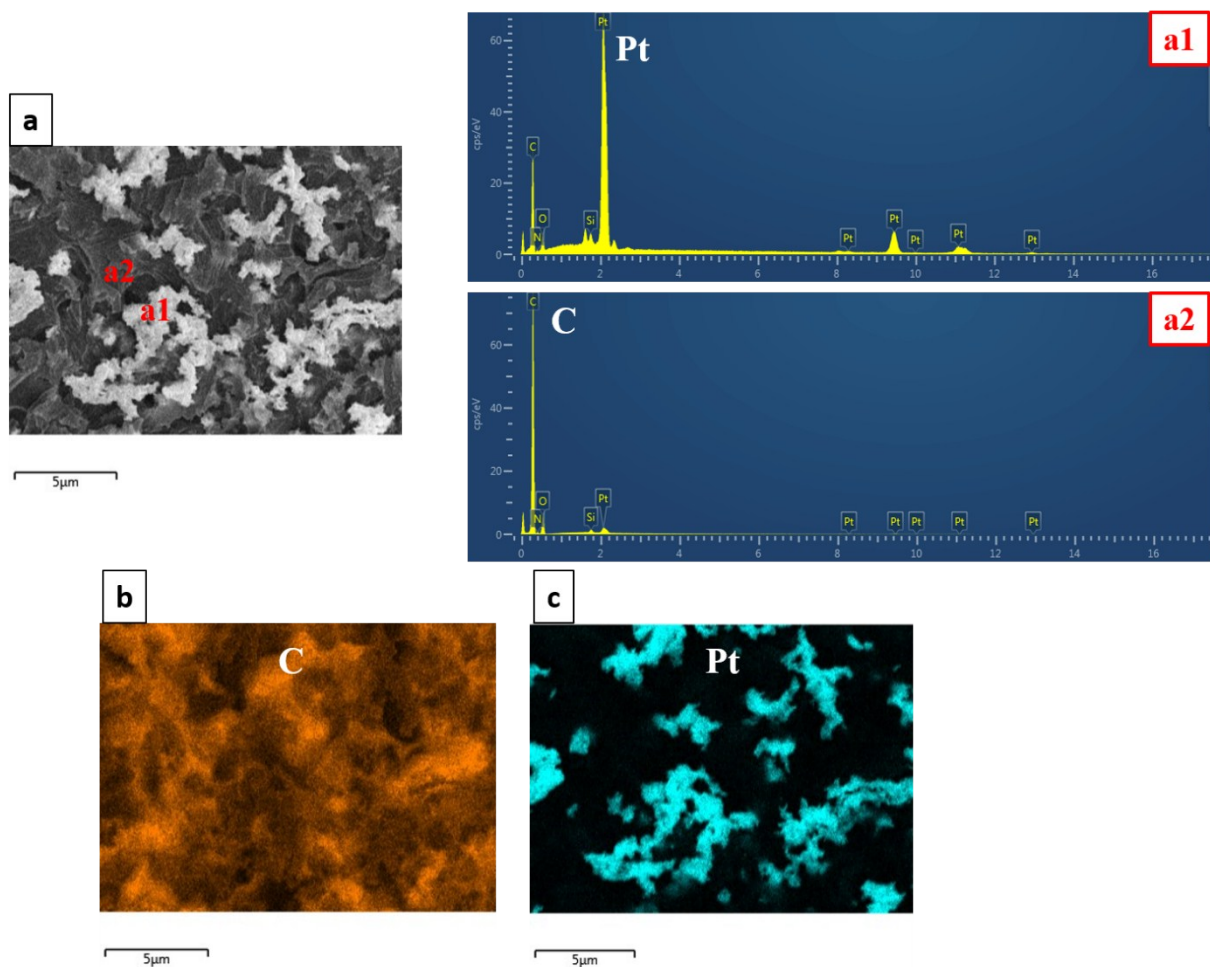

**Fig. S3** a) SEM image and the corresponding EDS spectra of the platinum layer printed on Upilex and annealed at 350°C b) EDS mapping of elemental carbon c) EDS mapping of elemental platinum

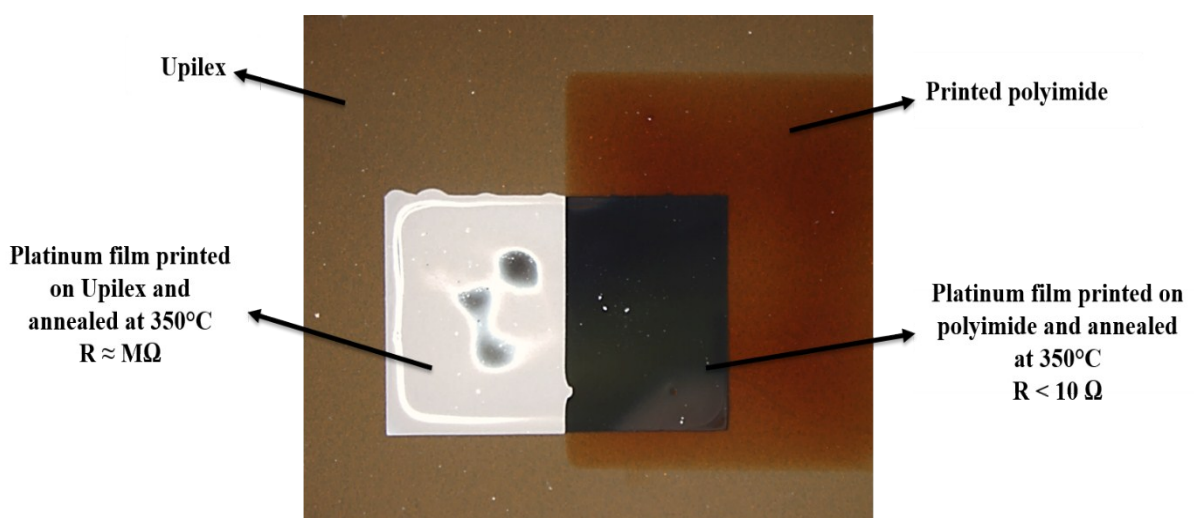

**Fig. S4** Image observed by binocular microscopy onto 2 different substrates: Upilex (left) and printed polyimide (right) and annealed at 350 °C

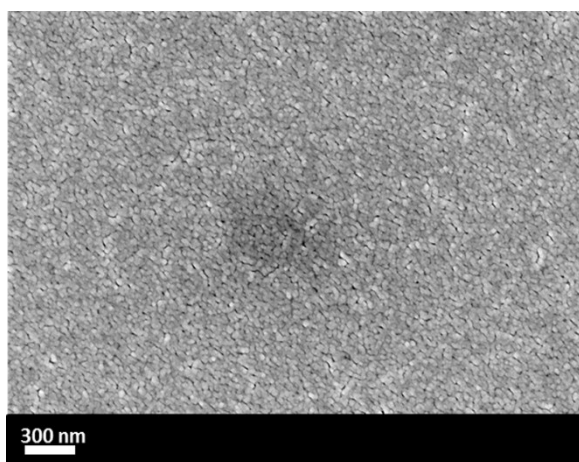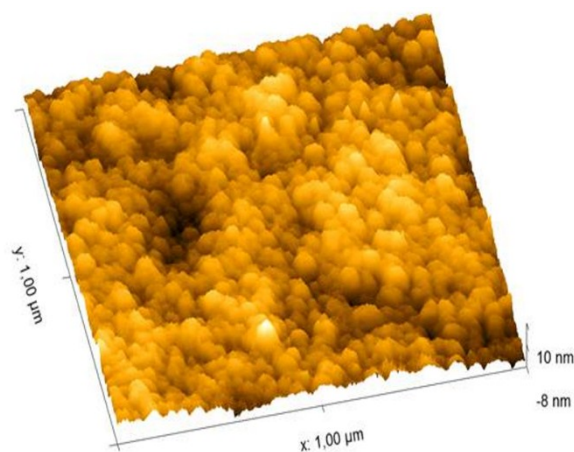

**Fig. S5** Morphology of the platinum film printed on the polyimide and annealed at 350 °C, observed by SEM and AFM

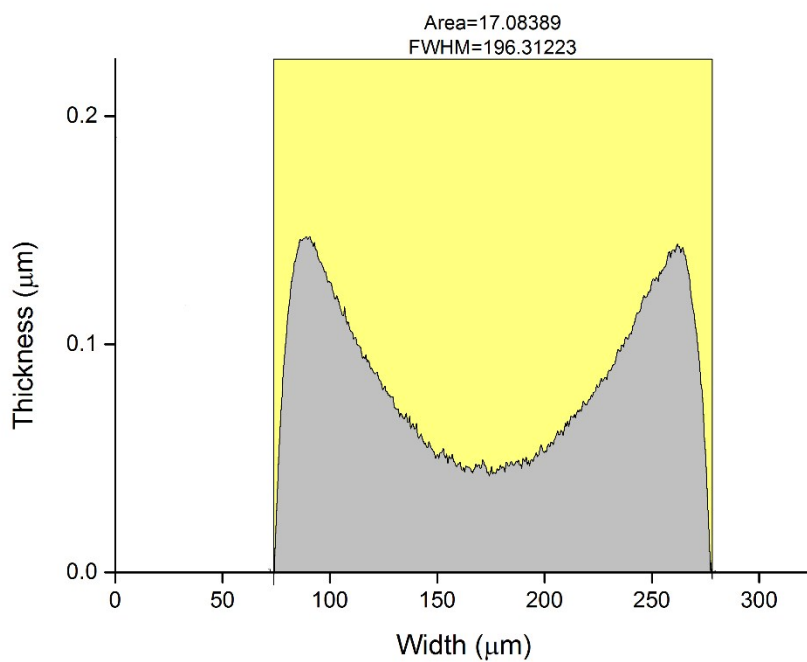

**Fig. S6** Section of platinum pattern measured by mechanical profilometer

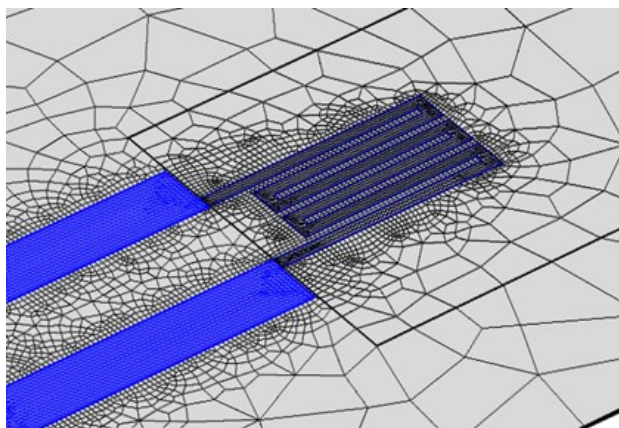

**Fig. S7** View of the “free triangular” mesh used in the heater simulation
